# Supplementary material
Source: Springer Nature journal article supplement (https://www.springermedizin.de/resource/supplementary/12889_2013_5661_MOESM2_ESM.docx/9495972)
Supplement: MOESM2 [file 9495972]

Table 2: Effect of a Completely Smoke free Campus Policy

|  | Non-smokers  N (%) | Ex-smokers  N (%) | Smokers  N (%) | Total  N (%) | P value |
| --- | --- | --- | --- | --- | --- |
| **Staff quality of life** |  |  |  |  | 0.000 |
| Negative | 40 (5.2) | 9 (8.4) | 20 (22.2) | 69 (7.1) |  |
| Neither negative or positive | 149 (19.3) | 27 (25.2) | 42 (46.7) | 218 (22.5) |  |
| Positive | 582 (75.5) | 71 (66.4) | 28 (31.1) | 681 (70.4) |  |
| **Student quality of life** |  |  |  |  | 0.000 |
| Negative | 40 (5.2) | 8 (7.5) | 21 (23.3) | 69 (7.1) |  |
| Neither negative or positive | 112 (14.5) | 29 (27.1) | 25 (38.9) | 176 (18.2) |  |
| Positive | 619 (80.3) | 70 (65.4) | 34 (37.8) | 723 (74.7) |  |
| **Student learning** |  |  |  |  | 0.000 |
| Negative | 31 (4.0) | 6 (5.6) | 18 (20) | 55 (7.9) |  |
| Neither negative or positive | 260 (33.7) | 59 (55.1) | 52 (57.8) | 371 (38.3) |  |
| Positive | 480 (62.3) | 42 (39.3) | 20 (22.2) | 542 (56) |  |
| **Student enrolment** |  |  |  |  | 0.000 |
| Negative | 63 (8.2) | 17 (15.9) | 15 (16.7) | 95 (9.8) |  |
| Neither negative or positive | 360 (46.7) | 58 (54.2) | 60 (66.7) | 478 (49.4) |  |
| Positive | 348 (45.1) | 32 (29.9) | 15 (16.7) | 395 (40.8) |  |
